# Supplementary material
Source: Springer Nature journal article supplement (https://www.springermedizin.de/resource/supplementary/13024_2013_507_MOESM7_ESM.pdf/9644096)

**A**

NTG

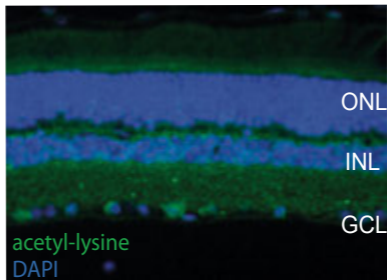SCA7  
10Q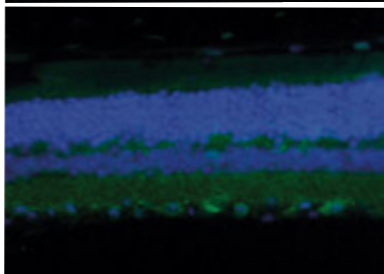SCA7  
92Q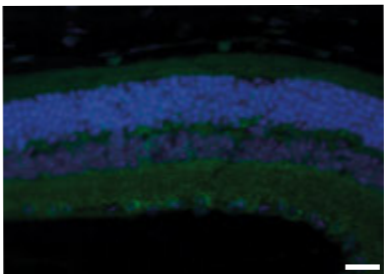**B**

NTG

SCA7  
10QSCA7  
92Qsirtuin  
activitybuffer  
control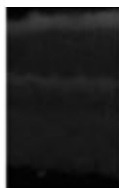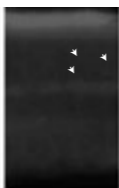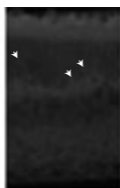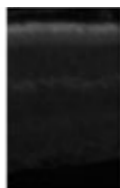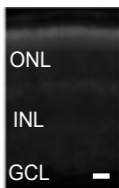

Supplement: MOESM7 [file 9644096]
